# Supplementary material for: Long COVID and Hybrid Immunity among Children and Adolescents Post-Delta Variant Infection in Thailand
Source: MDPI journal article supplement (doi:10.3390/vaccines11050884), 2023-04-23
Supplement: s1 [file s1]

Questionnaires for children and adolescents

Subject No. | 4 | 1 |    |

Initial |   |

The study of post-COVID-19 conditions and follow  
immunogenicity among children and adolescents  
post-SARS-CoV-2 infection in King Chulalongkorn  
Memorial Hospital

**Visit 1**

The questionnaires of health problems after SARS-CoV-2 infection

**Demographic and baseline clinical characteristics**

Date to collect data

(Day/month/year) //

1. Gender            ☐ Female            ☐ Male
2. Aged \_\_\_\_\_ year \_\_\_\_\_ month \_\_\_\_\_ day
3. Height \_\_\_\_\_ cm
4. Bodyweight \_\_\_\_\_ kg
5. Date of diagnosis SARS-CoV-2 infection \_\_\_\_\_
6. Diagnosis            ☐ Asymptomatic            ☐ Symptomatic
7. Definite diagnosis.    ☐ Upper respiratory tract infection    ☐ Pneumonia  
                                         ☐ Other, describe; \_\_\_\_\_
8. Underlying disease    ☐ No            ☐ Underlying disease, describe; \_\_\_\_\_
9. Place in treatment when diagnosis of SARS-CoV-2 infection  
     ☐ Ward    ☐ ICU    ☐ Hospital    ☐ Community isolation    ☐ Home isolation
10. Respiratory support when infected  
     ☐ Oxygen canula or mask    ☐ HHHFNC    ☐ Non-invasive PPV    ☐ Mechanical ventilation
11. mRNA (BNT162b2) vaccination  
     ☐ 1 dose            ☐ 2 doses            ☐ More than 2 doses  
     ☐ Date of received first dose of COVID-19 vaccine //  
     ☐ Date of received second dose of COVID-19 vaccine //  
     ☐ Date of received other dose of COVID-19 vaccine \_\_\_\_\_

Sign \_\_\_\_\_ Date \_\_\_\_\_

| 1. Residual or new symptoms after recovery from acute SARS-CoV-2 infection past 14 days to 3 months before this visit |                                        |            |       |  |
|-----------------------------------------------------------------------------------------------------------------------|----------------------------------------|------------|-------|--|
| O No                                                                                                                  | O Yes, please check mark in this below |            |       |  |
| 1. Fever                                                                                                              | O No                                   | O Yes      | O N/A |  |
| 2. Fatigue                                                                                                            | O No                                   | O Yes      | O N/A |  |
| 3. Muscle pain                                                                                                        | O No                                   | O Yes      | O N/A |  |
| 4. Headache                                                                                                           | O No                                   | O Yes      | O N/A |  |
| 5. Cough                                                                                                              | O No                                   | O Yes      | O N/A |  |
| 6. Sore throat                                                                                                        | O No                                   | O Yes      | O N/A |  |
| 7. Anosmia                                                                                                            | O No                                   | O Yes      | O N/A |  |
| 8. Rhinorrhea/nasal congestion                                                                                        | O No                                   | O Yes      | O N/A |  |
| 9. Chest pain or chest tightness                                                                                      | O No                                   | O Yes      | O N/A |  |
| 10. Dyspnea                                                                                                           | O No                                   | O Yes      | O N/A |  |
| 11. Difficulty breathing                                                                                              | O No                                   | O Yes      | O N/A |  |
| 12. Rash                                                                                                              | O No                                   | O Yes      | O N/A |  |
| 13. Insomnia                                                                                                          | O No                                   | O Yes      | O N/A |  |
| 14. Diarrhea                                                                                                          | O No                                   | O Yes      | O N/A |  |
| 15. Constipation                                                                                                      | O No                                   | O Yes      | O N/A |  |
| 16. Abdominal pain                                                                                                    | O No                                   | O Yes      | O N/A |  |
| 17. Hair loss                                                                                                         | O No                                   | O Yes      | O N/A |  |
| 18. Abnormal movement                                                                                                 | O No                                   | O Yes      | O N/A |  |
| 19. Abnormal posture                                                                                                  | O No                                   | O Yes      | O N/A |  |
| 20. Somnolence                                                                                                        | O No                                   | O Yes      | O N/A |  |
| 21. Weight loss                                                                                                       | O No                                   | O Yes      | O N/A |  |
| 22. Difficulty swallowing                                                                                             | O No                                   | O Yes      | O N/A |  |
| 23. Loss of appetite                                                                                                  | O No                                   | O Yes      | O N/A |  |
| 24. Arthralgia                                                                                                        | O No                                   | O Yes      | O N/A |  |
| 25. Dizziness                                                                                                         | O No                                   | O Yes      | O N/A |  |
| 26. Syncope                                                                                                           | O No                                   | O Yes      | O N/A |  |
| 27. Blurred vision                                                                                                    | O No                                   | O Yes      | O N/A |  |
| 28. Urinary problems                                                                                                  | O No                                   | O Yes      | O N/A |  |
| 29. Loss of taste                                                                                                     | O No                                   | O Yes      | O N/A |  |
| 30. Tremor                                                                                                            | O No                                   | O Yes      | O N/A |  |
| 31. Numbness                                                                                                          | O No                                   | O Yes      | O N/A |  |
| 32. Loss of concentration                                                                                             | O No                                   | O Yes      | O N/A |  |
| 33. Irregular menstruation                                                                                            | O No                                   | O Yes      | O N/A |  |
| 34. Conjunctivitis                                                                                                    | O No                                   | O Yes      | O N/A |  |
| 35. Communication skill problems                                                                                      | O No                                   | O Yes      | O N/A |  |
| 36. Seizure                                                                                                           | O No                                   | O Yes      | O N/A |  |
| 37. Other symptoms, if any, please describe; _____                                                                    |                                        |            |       |  |
| 38. Summary of symptoms; _____ symptom                                                                                |                                        |            |       |  |
| Sign _____                                                                                                            |                                        | Date _____ |       |  |

**2. Diagnosis of complications after SARS-CoV-2 infection**

- ☐ No
- ☐ multisystem inflammatory syndrome Pulmonary embolism /micro emboli (PE, "Clot in lung")
- ☐ Kawasaki disease
- ☐ Multisystem inflammatory syndrome (MIS-C/PIMS-TS)
- ☐ Respiratory failure
- ☐ Asthma
- ☐ Myocarditis (inflammation of the heart muscle)
- ☐ Depression
- ☐ Anxiety
- ☐ Diabetes ☐ Type 1 ☐ Type 2
- ☐ Shock / Toxic shock syndrome
- ☐ Coagulopathy (excessive bleeding or clotting)
- ☐ Kidney problems
- ☐ Intussusception
- ☐ SARS-CoV-2 re-infection, date of re-infection \_\_\_\_\_
- Other diagnosis, please describe; \_\_\_\_\_

Sign \_\_\_\_\_ Date \_\_\_\_\_

**3. Physical examination:** BT .  C, HR  bpm, BP / mmHg, RR /min

|                       |          |                  |               |                   |
|-----------------------|----------|------------------|---------------|-------------------|
| General appearance    | O Normal | O Abnormal _____ | O Significant | O not Significant |
| Skin                  | O Normal | O Abnormal _____ | O Significant | O not significant |
| HEENT                 | O Normal | O Abnormal _____ | O Significant | O not significant |
| Cardiovascular system | O Normal | O Abnormal _____ | O Significant | O not significant |
| Pulmonary system      | O Normal | O Abnormal _____ | O Significant | O not significant |
| Abdomen               | O Normal | O Abnormal _____ | O Significant | O not significant |
| Lymphatic system      | O Normal | O Abnormal _____ | O Significant | O not significant |
| Other                 | O Normal | O Abnormal _____ | O Significant | O not significant |

Comments: \_\_\_\_\_

Sign \_\_\_\_\_ Date \_\_\_\_\_

**4. Investigations**

CBC O Hb \_\_\_\_\_

AST \_\_\_\_\_ U/L ALT \_\_\_\_\_ U/L

Neutralizing antibody against Delta variants \_\_\_\_\_ % inhibition

Neutralizing antibody against Omicron variants \_\_\_\_\_ % inhibition

anti-S-RBD IgG \_\_\_\_\_ BAU/mL

Film chest x-ray O 0. Normal O 1. Abnormal

If Abnormal chest x-ray O 1. bilateral or unilateral ground glass opacities

O 2. bilateral of unilateral interstitial infiltration

O 3. bilateral or unilateral consolidation

O 4. bilateral of unilateral pleural effusion

Sign \_\_\_\_\_ Date \_\_\_\_\_
